# Supplementary material
Source: PubMed Central journal article supplement (PMC1345701)

**Supplementary Figure 1.** Titration of polynucleotide sequence mixture with increasing concentrations of netropsin. The peak assignments and solution conditions are identical to those shown in Figure 2. Each polynucleotide is present at a concentration of 20  $\mu\text{M}$  bp, yielding a total polynucleotide concentration of 100  $\mu\text{M}$  bp. Netropsin concentrations ( $\mu\text{M}$ ) are: (A) 1; (B), 2.5; (C), 3.5.

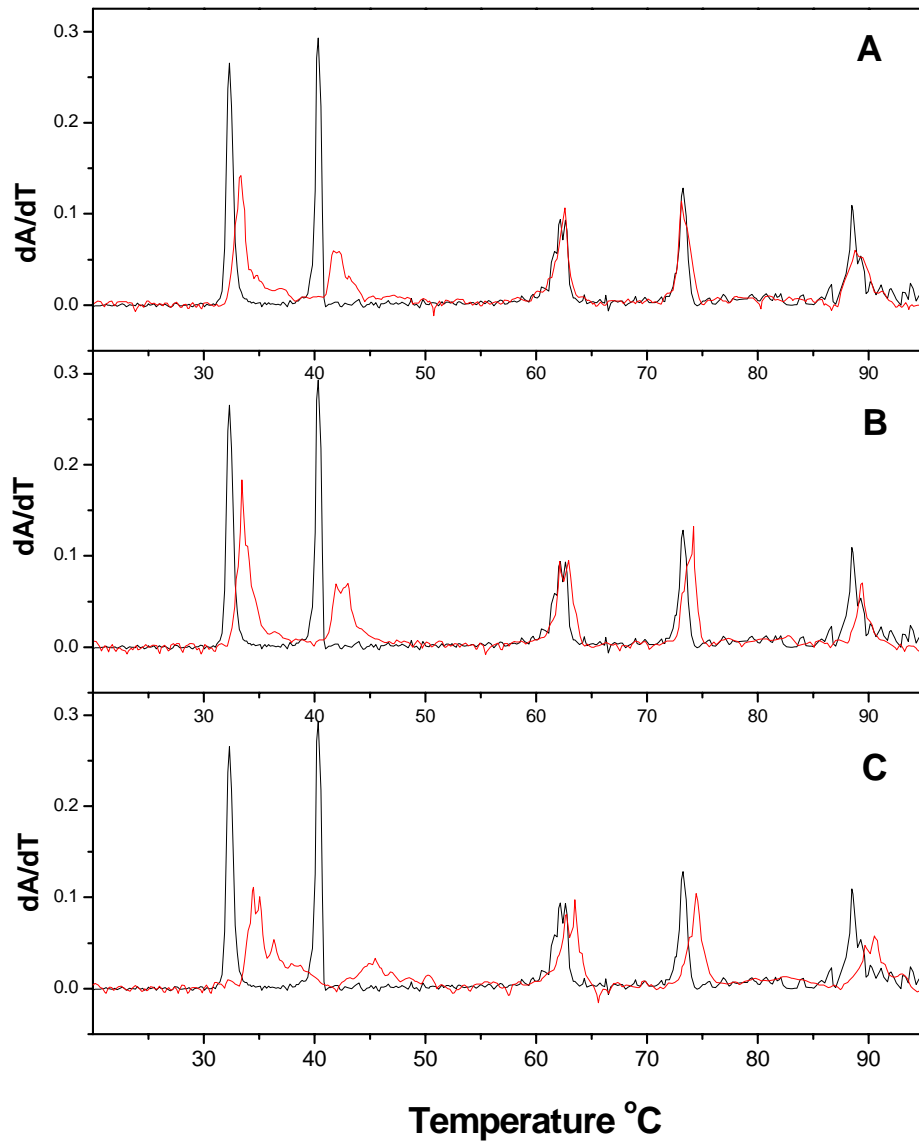

Supplement: nar_34_2_e14__1.pdf [file nar_34_2_e14__1.pdf]
